# Supplementary material for: A full-coverage satellite-based global atmospheric CO 2 dataset at 0.05° resolution from 2015 to 2021 for exploring global carbon dynamics
Source: Copernicus journal article supplement (doi:10.5194/essd-2024-315), 2024-10-25
Supplement: Supplementary file [file essd-2024-315-AC1-supplement.pdf]

**Response to Anonymous Referee #1:**

This manuscript presents the development of a global dataset of column-averaged dry-air mole fraction of CO<sub>2</sub> (XCO<sub>2</sub>) at high resolution (0.05°) using multi satellite products, and an improved deep learning model. They further evaluate new datasets using the measurements from the TCCON network. While the study shows promise, there are significant concerns regarding methodological transparency, and clarity of explicit demonstration of advantages over existing satellite products. Addressing these issues will greatly enhance the manuscript's impact and originality.

**Response:** We sincerely appreciate your thorough review of our manuscript and the valuable, constructive feedback. In response, we have expanded our discussion of the methods, and the advantages of our products over existing XCO<sub>2</sub> data. Our point-by-point responses to your comments are provided below.

**Q1.** (1) The manuscript lacks in describing the methodological details of the improved deep learning model. The authors should clearly outline the specific innovations or modifications that lead to improved accuracy.

**Response:** Thanks for the suggestion. Given the complex temporal dependencies and nonlinear relationships between atmospheric XCO<sub>2</sub> and a wide range of environmental variables, we selected the Attention-based Bidirectional Long Short-Term Memory (At-BiLSTM) model for this study. This choice is motivated by several key considerations:

Firstly, LSTM networks are well-suited for modeling temporal sequences and capturing long-range dependencies, which is essential for understanding the seasonal variations of XCO<sub>2</sub> and dynamic feedbacks between XCO<sub>2</sub> and environmental drivers such as temperature, vegetation activity, and surface pressure. The bidirectional structure enhances this capability by allowing the model to consider both past and future context in the time series, thereby providing a more comprehensive representation of the underlying temporal dynamics.

Secondly, the incorporation of the attention mechanism enables the model to dynamically focus on the most critical time steps when making predictions. This is particularly important when dealing with high-dimensional input data comprising

multi-timestep variables, as it allows the model to assign different weights to different input features, thereby improving interpretability and predictive performance.

Finally, the At-BiLSTM model's ability to capture nonlinear relationships is crucial in the context of atmospheric CO<sub>2</sub> modeling, where interactions between variables are complex and nonlinear. By leveraging the strengths of deep learning, the model can learn intricate patterns from the multi-source data that are difficult to capture with traditional statistical or linear models.

Therefore, we chose At-BiLSTM model as a robust and flexible framework to reconstructing XCO<sub>2</sub> at fine spatial resolution with improved accuracy and spatiotemporal consistency.

We have included the necessary clarifications in **2.2 Deep learning-based XCO<sub>2</sub> reconstruction**:

“The LSTM model is a variant of RNN that excels in modeling temporal sequences and capture long-range dependencies (Hochreiter and Schmidhuber, 1997; Graves et al., 2005), which is essential for understanding the seasonal variations of XCO<sub>2</sub> and dynamic feedbacks between XCO<sub>2</sub> and environmental drivers we selected. Each LSTM cell includes an input gate, a forget gate and an output gate. The forget gate  $f_t$  determines which information from the previous time step to forget (Eq. 1):

$$f_t = \sigma(W_f \cdot [h_{t-1}, x_t] + b_f) \quad (1)$$

where  $\sigma$ ,  $W_f$ ,  $[h_{t-1}, x_t]$ , and  $b_f$  denotes the sigmoid activation function, vectors of weights, concatenation of the hidden state at timestep  $t-1$  and the current input, and the bias vector, respectively.

The input gate  $i_t$  governs the selective storage of the data in current time step, and the output from forget gate  $f_t$  and input gate  $i_t$  are combined in the cell state  $C_t$  (Eq. 2-3):

$$i_t = \sigma(W_i \cdot [h_{t-1}, x_t] + b_i) \quad (2)$$

$$C_t = f_t \cdot C_{t-1} + i_t \cdot \tanh(W_c \cdot [h_{t-1}, x_t] + b_c) \quad (3)$$

where  $W_i$  and  $W_c$  denote the weight matrix for the input gate and the current cell state, respectively;  $b_i$  and  $b_c$  are the bias vector of the input gate and the current cell state, respectively;  $C_{t-1}$  and  $\tanh$  represent the cell state at timestep  $t-1$  and the activation function.

Lastly, the output gate  $o_t$  controls the flow of information from the cell state to the next time step.

$$o_t = \sigma(W_o \cdot [h_{t-1}, x_t] + b_o) \quad (4)$$

where  $W_o$  and  $b_o$  denotes the weight matrix and the bias vector of the output gate, respectively.

These gate structures effectively manage the flow of information within the LSTM, enabling it to capture the temporal dependencies present in the data (Yuan et al., 2020; Su et al., 2021). Bidirectional LSTM consists of two directional LSTM, in which the data flows forward and backward (Graves et al., 2013). The bidirectional structure was chosen to enhance the capability of LSTM by allowing the model to consider both past and future context in the time series, thereby providing a more comprehensive understanding of the underlying temporal dynamics.

We also defined a multi-dimensional attention layer behind the BiLSTM to focus on more critical timesteps and give them higher weights (Bahdanau et al., 2016). This is particularly important when dealing with high-dimensional input data comprising multi-timestep variables, as it allows the model to assign different weights to different timesteps, thereby improving interpretability and predictive performance (Liu and Guo, 2019). Based on this framework, the At-BiLSTM model offers a robust and flexible framework for linking XCO<sub>2</sub> with multiple environmental variables and reconstructing XCO<sub>2</sub> at fine spatial resolution with improved accuracy and spatiotemporal consistency.”

And we have also added the detailed deployment and output of this deep learning model as follows:

“The At-BiLSTM consists of one input layer, three Bidirectional LSTM (Bi-LSTM) layers, one attention layer, one dropout layer to prevent overfitting, and one fully connected layer (i.e., dense layer) for the final output. Each Bi-LSTM includes 512 hidden units and tanh activation in both forward and backward directions. The attention mechanism learns a weight distribution over the time dimension using a Dense layer with softmax activation, then multiplies these weights with the BiLSTM output to emphasize important time steps. The detailed deployment and output are provided in Table 3. The model was implemented using the TensorFlow and Keras deep learning APIs in Python. A time step of 3 was used, and the model was trained for 200 epochs with the mean squared error (MSE) as the loss function. A step-wise decay strategy was applied to the learning rate, where the rate was reduced by a factor of 10 every 50 epochs to enhance training stability and convergence. Prior to training, all input data were normalized using the mean and standard deviation of the dataset.”

**Table 3.** Architecture of the At-BiLSTM model

| Layer Name   | Layer       | Parameters                        | Output size     |
|--------------|-------------|-----------------------------------|-----------------|
| Bi-LSTM      | Input layer |                                   | $3 \times 16$   |
|              | Bi-LSTM1    | units = 512, activation = ‘tanh’  | $3 \times 1024$ |
|              | Bi-LSTM2    | units = 512, activation = ‘tanh’  | $3 \times 1024$ |
|              | Bi-LSTM3    | units = 512, activation = ‘tanh’  | $3 \times 1024$ |
| Attention    | Permute     | -                                 | $1024 \times 3$ |
|              | Dense       | units = 3, activation = ‘softmax’ | $1024 \times 3$ |
|              | Permute     | -                                 | $3 \times 1024$ |
|              | Multiply    | -                                 | $3 \times 1024$ |
| Dropout      |             | rate = 0.5                        |                 |
| Full-connect | Dense       | units = 1                         | 1               |

(2) Additionally, since the formation and distribution of XCO<sub>2</sub> are influenced by atmospheric transport processes across multiple vertical layers (and not solely by surface fluxes), it is important that the manuscript explains how these vertical transport processes are incorporated into the model. If these processes are not accounted for, this limitation should be explicitly acknowledged.

**Response:** Thank you for raising this important point. In this study, we estimated column-averaged CO<sub>2</sub> (XCO<sub>2</sub>), and as such, vertical transport processes were not explicitly incorporated into the modeling framework. However, we acknowledge that vertical redistribution of CO<sub>2</sub> through atmospheric transport processes (e.g., mixing and convection) can significantly influence the spatiotemporal patterns of XCO<sub>2</sub>, particularly by altering the linkage between surface fluxes and column concentrations. The absence of vertical transport indicators in our model may limit its accuracy, especially in regions or periods characterized by strong vertical mixing. We have included a discussion of this limitation and have highlighted it as a key area for future model enhancement in **4.2 Limitations and future improvements:**

“Additionally, though our model integrates multiple environmental variables associated with surface carbon flux variations, it does not account for vertical atmospheric transport. As XCO<sub>2</sub> represents the column-averaged CO<sub>2</sub> concentration, vertical redistribution of CO<sub>2</sub> through atmospheric transport (e.g., mixing, convection) can alter the relationship between surface carbon fluxes and column concentrations.

The absence of such vertical transport indicators may reduce the model's accuracy in regions or periods with strong vertical mixing. Future efforts will incorporate vertical transport-related variables, such as planetary boundary layer height, vertical wind components, and other reanalysis-derived indicators, to better represent the atmospheric processes that influence the column-averaged CO<sub>2</sub> signal.”

**Q2.** Although the authors present a new global XCO<sub>2</sub> product at 0.05° resolution, the distinct novelty and advantages over existing datasets remain unclear. The study should explicitly state how the analyzed information significantly differs from or improves upon existing satellite data. While validation against TCCON is good, the authors should explicitly compare these results with those from existing datasets to clearly demonstrate accuracy improvements.

**Response:** Thanks for the constructive suggestion. To validate the effectiveness of our model and resulting XCO<sub>2</sub> products, we firstly compared our results with current studies which focuses on global XCO<sub>2</sub> reconstruction. Afterwards, we compared our products with original OCO-2 observations and three publicly available global XCO<sub>2</sub> datasets to evaluate the advancement of our XCO<sub>2</sub> product. The comparison results have added in **4.1 Comparison with previous studies** as follow:

“To validate the effectiveness of our model and resulting XCO<sub>2</sub> products, we compared our results with current studies which focuses on global XCO<sub>2</sub> reconstruction (Table 5). As for the in-situ validation, most existing studies report high accuracy with almost all R<sup>2</sup> over 0.9, RMSE less than 2 ppm. Regarding spatial resolution, the various products differ substantially, ranging from 1° down to 0.01°. It should be noted that increasing spatial resolution tends to compromise the accuracy of XCO<sub>2</sub> retrievals. However, our XCO<sub>2</sub> product achieves an optimal balance between spatial detail and measurement precision, exhibiting both high spatial resolution (0.05°) and robust accuracy (R<sup>2</sup>=0.91, RMSE =1.54 ppm) in comprehensive evaluations.

**Table 5.** Comparison between current studies focusing on global XCO<sub>2</sub> reconstruction

| Model                  | Spatial resolution | In-situ validation |       |       | Reference           |
|------------------------|--------------------|--------------------|-------|-------|---------------------|
|                        |                    | (with TCCON)       |       |       |                     |
|                        |                    | R <sup>2</sup>     | RMSE  | MAE   |                     |
|                        |                    |                    | (ppm) | (ppm) |                     |
| Attentional-based LSTM | 0.05°              | 0.91               | 1.54  | 1.22  | Our study           |
| Deep forest            | 0.1°               | 0.96               | 1.01  | -     | Zhang et al. (2023) |
| S-STDCT                | 0.25°              | 0.95               | 1.18  | -     | Wang et al. (2023)  |
| Spatiotemporal kriging | 1°                 | 0.97               | 1.13  | 0.88  | Sheng et al. (2022) |
| MLE & OI               | 0.5°               | 0.92               | 2.62  | 1.53  | Jin et al. (2022)   |
| ERT                    | 0.01°              | 0.83               | 1.79  | -     | Li et al. (2022)    |

\*S-STDCT: Self-supervised spatiotemporal discrete cosine transform, MLE & OI: maximum likelihood estimation method and optimal interpolation; ERT: Extremely randomized trees

To evaluate the advancement of our XCO<sub>2</sub> product, we compared it with original OCO-2 observations and publicly available global XCO<sub>2</sub> datasets (Wang et al., 2023; Sheng et al., 2022; Zhang et al., 2023) across four regions: North America, Europe with northern Africa, Asia, and Oceania (Fig. 13) in January 2015. Despite monthly aggregation, OCO-2 data exhibit persistent spatial discontinuities, limiting the capacity to analyze monthly XCO<sub>2</sub> variability at regional and national scales. Existing XCO<sub>2</sub> products (spatial resolution of 0.25°, 1°, and 0.1°, respectively) broadly reproduce large-scale XCO<sub>2</sub> patterns but fail to resolve fine-scale heterogeneity. In comparison, our reconstructed XCO<sub>2</sub>, with the highest spatial resolution, provides a more detailed and accurate representation of the regional XCO<sub>2</sub> patterns. For example, lower XCO<sub>2</sub> concentrations are clearly identified in eastern Canada (The first row of Fig.13) and Papua New Guinea (The fourth row of Fig. 13), regions characterized by dense forest cover. This correspondence highlights the substantial carbon sink potential of these forested areas. Our high-resolution product better identifies the CO<sub>2</sub> heterogeneity associated with different land cover types, whereas the coarse-resolution products smooth these signals. This limitation primarily stems from the neglect of high-resolution land cover dynamics and dependence on coarse-resolution assimilated/reanalysis datasets (e.g., CAMS XCO<sub>2</sub>, CarbonTracker), resulting in oversmoothed spatial patterns that obscure satellite-derived high-resolution signals. Unlike assimilation-dependent approaches, our method avoids XCO<sub>2</sub> reanalysis inputs, preserving satellite-scale fidelity through high-resolution environmental variables modeling while maintaining precision.”

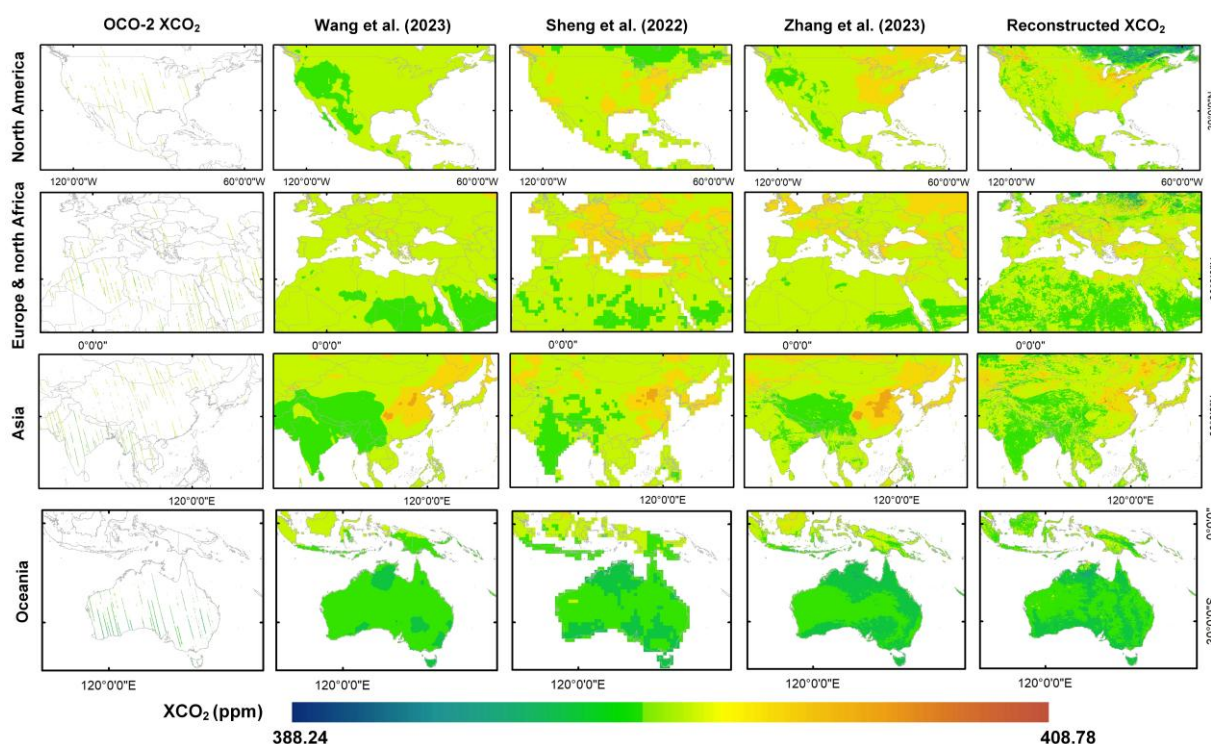

**Figure 13.** Comparison between the OCO-2 XCO<sub>2</sub> data, accessible XCO<sub>2</sub> products from Wang et al. (2023), Sheng et al. (2022), Zhang et al. (2023), and our reconstructed XCO<sub>2</sub> data in four regions, using the products of January of 2015 as an example.

**Q3.** The study lacks specificity in demonstrating how the new dataset quantitatively improves understanding relative to existing satellite data. Providing explicit examples or quantifiable differences would enhance the significance of this study.

**Response:** Thanks for this suggestion. Compared with the existing satellite data and reconstructed data, our products deliver two major enhancements: (1) Our reconstructed XCO<sub>2</sub> product overcomes the extensive data gaps typically caused by narrow satellite swaths and retrieval interference from clouds and aerosols, achieving complete global coverage without compromising measurement accuracy. (2) Relative to existing publicly available full-coverage global XCO<sub>2</sub> products, our product offers the finest spatial resolution (0.05°). Moreover, our method avoids coarse XCO<sub>2</sub> reanalysis inputs, preserving satellite-scale fidelity through high-resolution environmental variables modeling. Consequently, the products enable enhanced spatial details in identifying regional- and county-level XCO<sub>2</sub> hotspots, carbon emissions and fragmented carbon sinks, providing a robust basis for targeted global carbon governance policies at relevant scales. We have added explicit comparison between



OCO-2/3 data and our products in section 3.2 Spatiotemporal pattern of global XCO<sub>2</sub> as follow:

“The global distribution of annual mean XCO<sub>2</sub> concentration from 2015 to 2021 is illustrated in Fig. 8. The results reveal pronounced spatial heterogeneity in XCO<sub>2</sub> concentrations, characterized by a marked hemispheric asymmetry. Specifically, the Northern Hemisphere exhibited systematically elevated XCO<sub>2</sub> levels compared to the Southern Hemisphere, consistent with latitudinal gradients driven by anthropogenic emission patterns and atmospheric transport dynamics. Regionally, North America, East Asia, Central Africa, and northwest of Southern America were identified as persistent hotspots of enhanced XCO<sub>2</sub>. The high concentrations of XCO<sub>2</sub> in North America and East Asia stem primarily from the fossil fuel emission from energy production and transportation sectors. Whereas the tropical regions (i.e., Central Africa and South America) are influenced by coupled biomass burning and land-use changes.

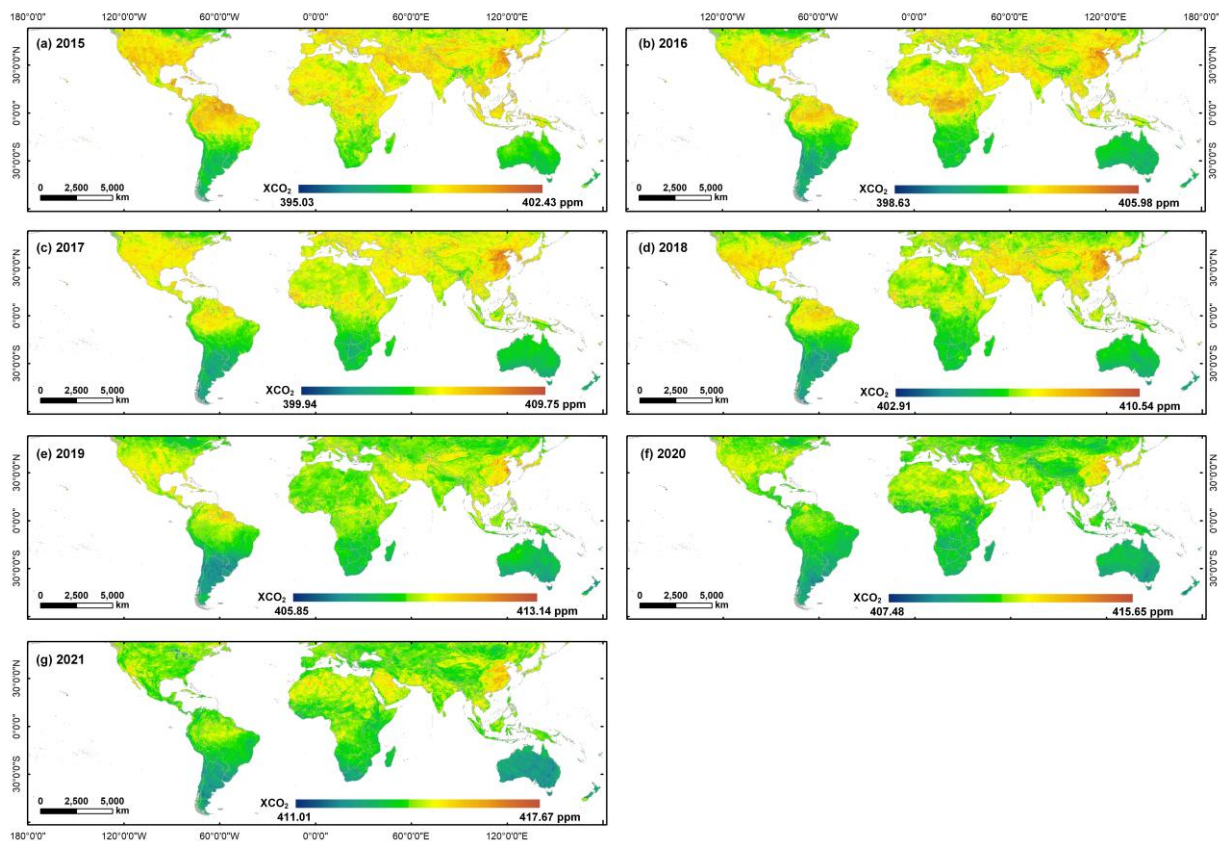

**Figure 8.** The global spatial distribution of reconstructed annual mean XCO<sub>2</sub> concentration from 2015 to 2021.

We also provided the annual OCO-2 XCO<sub>2</sub> data from 2015 to 2019 and OCO-3 XCO<sub>2</sub> data from 2020 to 2021 in Fig. 9. Spatially, our reconstructed XCO<sub>2</sub> dataset (Fig. 8) demonstrates robust consistency with satellite observations, particularly in mid-



latitude industrialized regions where both datasets capture emission hotspots. Notably, OCO-3 exhibits denser observational sampling due to its improved spatial coverage and swath width compared to OCO-2's narrow tracks. However, persistent data gaps remain prevalent in both two satellite products after annual aggregating. These spatial coverage limitations hinder fine-scale global analysis, particularly in assessing localized emission sources and regional scale carbon flux.”

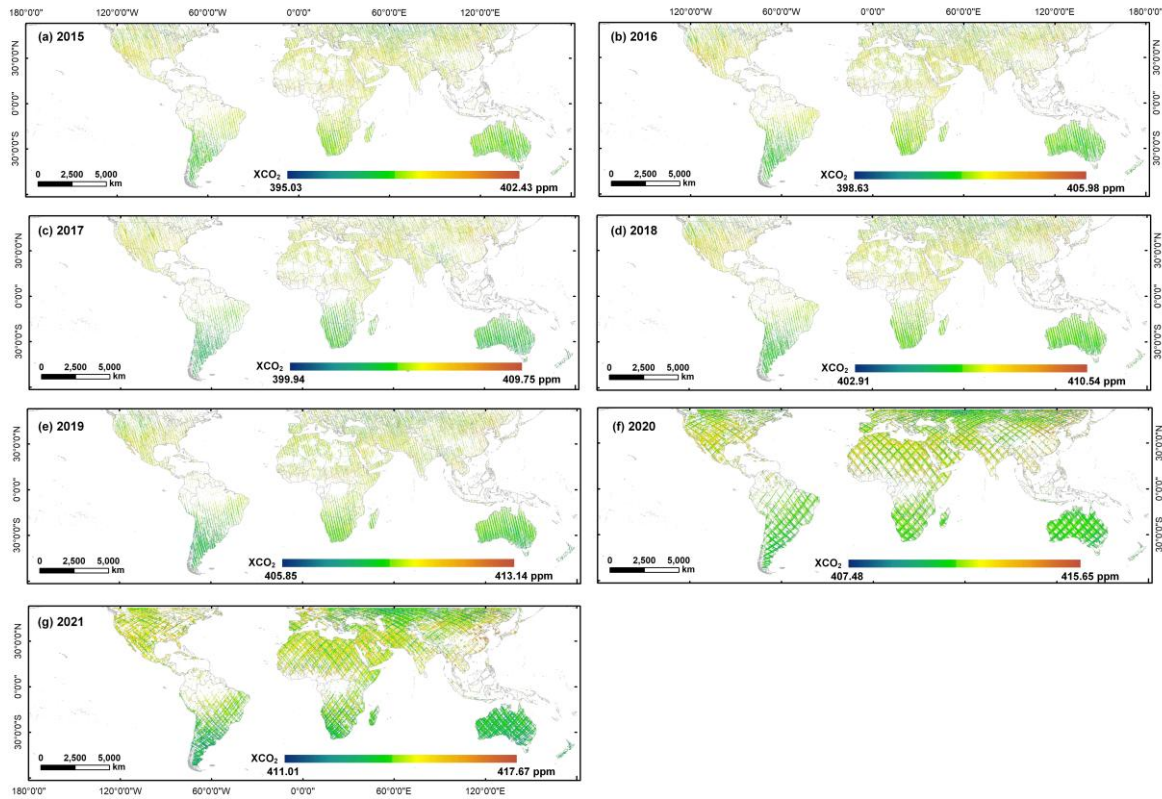

**Figure 9.** The global spatial distribution of annual mean OCO-2/OCO-3 XCO<sub>2</sub> concentration from 2015 to 2021.

Additionally, we also added a detailed local-scale evaluation contrasting OCO-2/3 observations, our reconstructed XCO<sub>2</sub> product, and other publicly available global XCO<sub>2</sub> datasets in **4.1 Comparison with previous studies**, as follows:

“To evaluate the advancement of our XCO<sub>2</sub> product, we compared it with original OCO-2 observations and publicly available global XCO<sub>2</sub> datasets (Wang et al., 2023; Sheng et al., 2022; Zhang et al., 2023) across four regions: North America, Europe with northern Africa, Asia, and Oceania (Fig. 13) in January 2015. Despite monthly aggregation, OCO-2 data exhibit persistent spatial discontinuities, limiting the capacity to analyze monthly XCO<sub>2</sub> variability at regional and national scales. Existing XCO<sub>2</sub> products (spatial resolution of 0.25°, 1°, and 0.1°, respectively) broadly reproduce large-scale XCO<sub>2</sub> patterns but fail to resolve fine-scale heterogeneity. In comparison,

our reconstructed XCO<sub>2</sub>, with the highest spatial resolution, provides a more detailed and accurate representation of the regional XCO<sub>2</sub> patterns. For example, lower XCO<sub>2</sub> concentrations are clearly identified in eastern Canada (The first row of Fig.13) and Papua New Guinea (The fourth row of Fig. 13), regions characterized by dense forest cover. This correspondence highlights the substantial carbon sink potential of these forested areas. Our high-resolution product better identifies the CO<sub>2</sub> heterogeneity associated with different land cover types, whereas the coarse-resolution products smooth these signals. This limitation primarily stems from the neglect of high-resolution land cover dynamics and dependence on coarse-resolution assimilated/reanalysis datasets (e.g., CAMS XCO<sub>2</sub>, CarbonTracker), resulting in oversmoothed spatial patterns that obscure satellite-derived high-resolution signals. Unlike assimilation-dependent approaches, our method avoids XCO<sub>2</sub> reanalysis inputs, preserving satellite-scale fidelity through high-resolution environmental variables modeling while maintaining precision.”

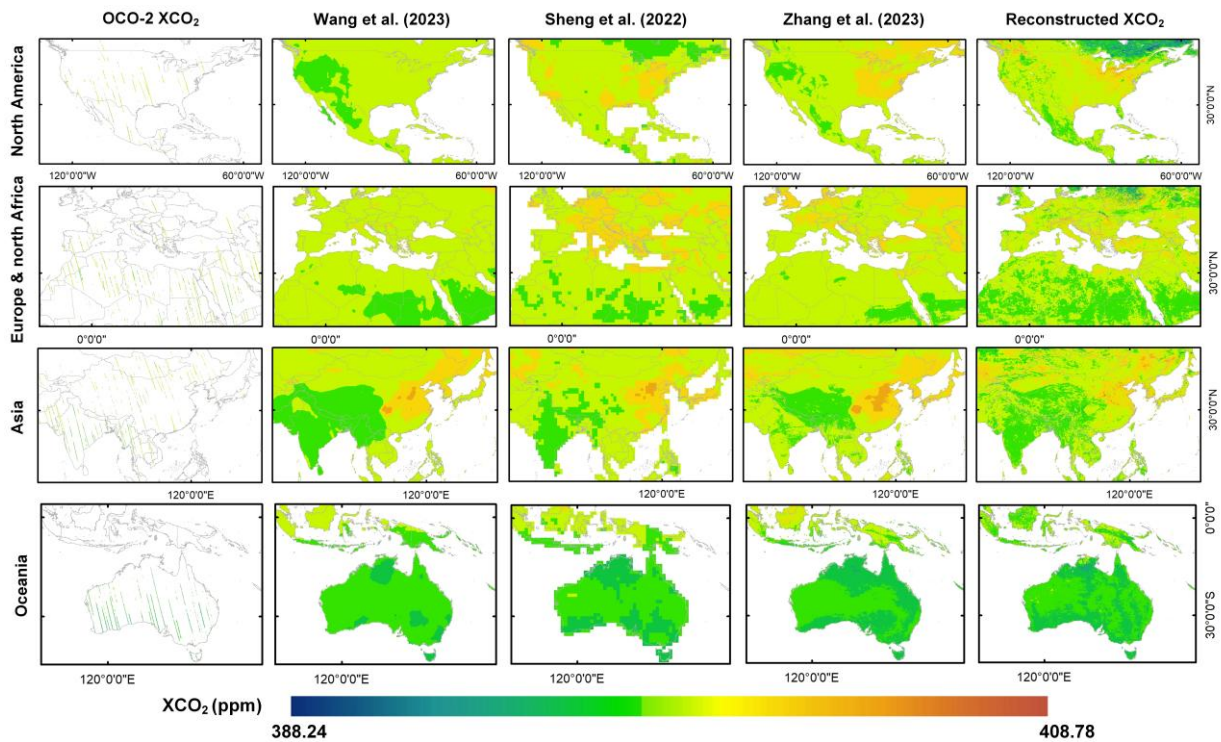

**Figure 13.** Comparison between the OCO-2 XCO<sub>2</sub> data, accessible XCO<sub>2</sub> products from Wang et al. (2023), Sheng et al. (2022), Zhang et al. (2023), and our reconstructed XCO<sub>2</sub> data in four regions, using the products of January of 2015 as an example.

**Q4.** The conclusion stating "promising advancement" is too broad. It should be explicitly clarified what specific policy, modeling, or scientific implications this advancement has, thus highlighting concrete applications or benefits.

**Response:** Thanks for this constructive suggestion. We have revised the section **6. Conclusion** and explicitly clarified the key contributions of this study:

“The main conclusions and contributions are as follows:

(1) The advanced At-BiLSTM model could successfully established the nonlinear relationship between satellite-derived XCO<sub>2</sub> and a set of key environmental variables. And the reconstructed XCO<sub>2</sub> based on our model shows relatively good agreement with TCCON XCO<sub>2</sub>, with R<sup>2</sup>, RMSE, and MAE values of 0.91, 1.58 ppm, and 1.22 ppm, respectively.

(2) The reconstructed XCO<sub>2</sub> product overcomes the extensive data gaps typically caused by narrow satellite swaths and retrieval interference from clouds and aerosols, achieving complete global coverage. Moreover, relative to existing publicly available full-coverage XCO<sub>2</sub> datasets, our product offers the finest spatial resolution (0.05°) while maintaining comparable accuracy.

(3) Our method avoids coarse XCO<sub>2</sub> reanalysis inputs, preserving satellite-scale fidelity through high-resolution environmental variables modeling. Consequently, the products enable enhanced ability in identifying regional- and county-level XCO<sub>2</sub> hotspots, carbon emissions and fragmented carbon sinks, providing a robust basis for targeted global carbon governance policies.”

We also changed the description in the **Abstract**:

“The XCO<sub>2</sub> dataset is publicly accessible on the Zenodo platform at <https://doi.org/10.5281/zenodo.12706142> (Wang et al., 2024). Our products enable enhanced ability in identifying regional- and county-level XCO<sub>2</sub> hotspots, carbon emissions and fragmented carbon sinks, providing a robust basis for targeted global carbon governance policies.”
